# Supplementary material
Source: publisher figshare collection journal article supplement (https://acs.figshare.com/ndownloader/files/9928018)
Supplement: Supplementary file 1 [file 9928018]

**CLIP6-PNA-peptide Conjugates: Non-endosomal Delivery of Splice Switching Oligonucleotides (SSO)**

Terese Soudah<sup>a</sup>, ‡ Maxim Mogilevsky<sup>b</sup>, ‡ Rotem Karni<sup>b</sup>, Eylon Yavin<sup>a\*</sup>

<sup>a</sup>The Institute for Drug Research, The School of Pharmacy, The Faculty of Medicine, The Hebrew University of Jerusalem, Hadassah Ein-Kerem, Jerusalem 91120, Israel.

<sup>b</sup>Department of Biochemistry and Molecular Biology, Institute for Medical Research Israel-Canada, The Faculty of Medicine, The Hebrew University of Jerusalem, Hadassah Ein-Kerem, Jerusalem 91120, Israel.

E-mail: [eylony@ekmd.huji.ac.il](mailto:eylony@ekmd.huji.ac.il); Fax: +972-2-6757574; [Tel: +972-2-6758692](tel:+972-2-6758692).

**Tables of contents:**

|                                                                 |           |   |
|-----------------------------------------------------------------|-----------|---|
| HPLC chromatograms of pure PNA-peptide conjugates               | Figure S1 | 3 |
| HPLC chromatograms of pure FITC-labelled PNA-peptide conjugates | Figure S2 | 4 |
| Primer sequences                                                | Table S1  | 5 |
| MTT Assay                                                       | Figure S3 | 5 |
| RT-PCR for Mnk2 splicing                                        | Figure S4 | 6 |

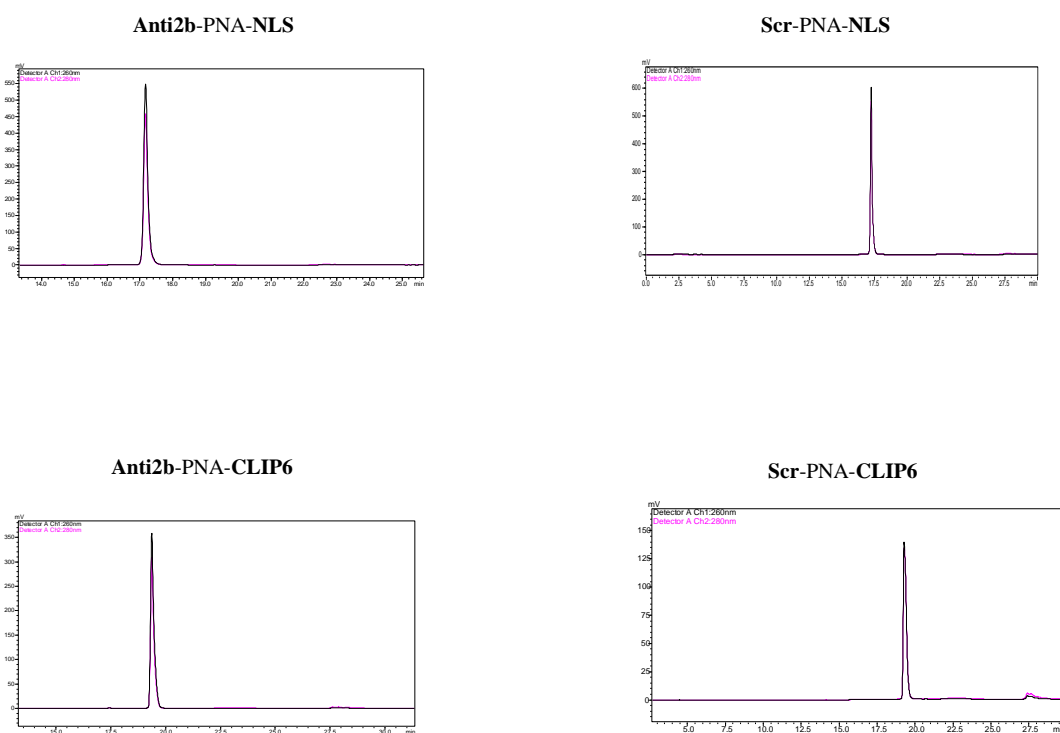

**Figure S1.** HPLC chromatograms of purified PNA-peptide conjugates. Over 95% purity for all PNA-peptide conjugates.

RP-HPLC (Shimadzu LC2010), semi-preparative C18 reverse-phase column (Phenomenex, Jupiter 300 A) at a flow rate of 4 mL/min. Mobile phase: 0.1% TFA in H<sub>2</sub>O (A) and acetonitrile (B).

Gradient: Initial –90% A, 10% B. 10 min –40% A, 60% B. 30 min –10% A, 90% B. 30.01 min –10% A, 90% B. 37 min –95% A, 5% B. 37.01 min– 95% A, 5% B. 40 min–stop, 44.01min.

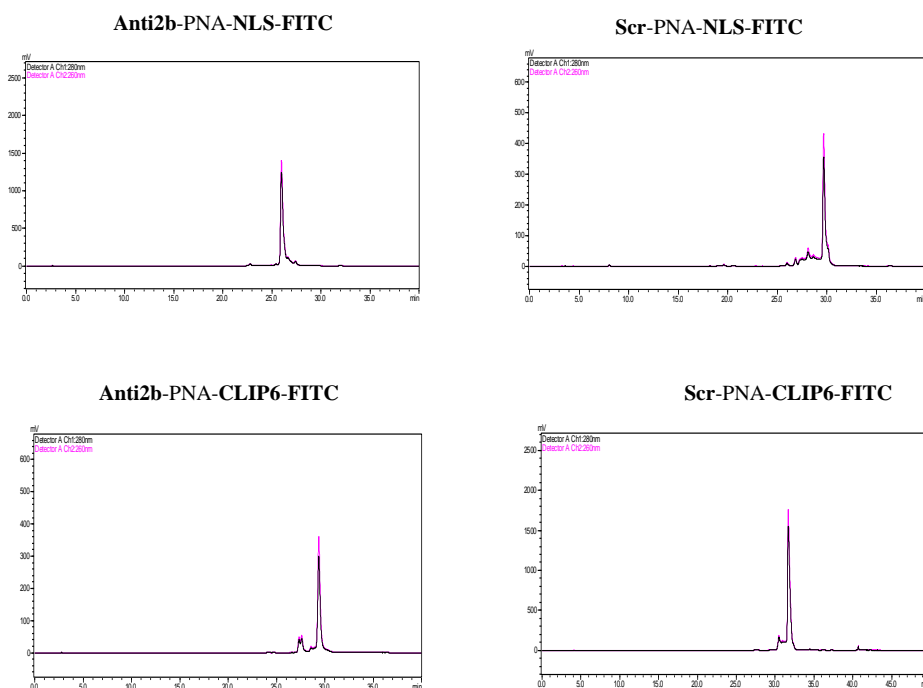

**Figure S2.** HPLC chromatograms of purified FITC-labeled PNA-peptide conjugates. Purity of FITC-labelled PNA-peptides: 94% for Anti2b-PNA-NLS-FITC; 86% for Scr-PNA-NLS-FITC; 90% for Anti2b-PNA-CLIP6-FITC; 94% for Scr-PNA-CLIP6-FITC.

RP-HPLC (Shimadzu LC2010), semi-preparative C18 reverse-phase column (Phenomenex, Jupiter 300 A) at a flow rate of 4 mL/min. Mobile phase: 0.1% TFA in H<sub>2</sub>O (A) and acetonitrile (B).

Gradient: Initial –90% A, 10% B. 10 min – 73% A, 27% B. 35 min –10% A, 90% B. 40.01 min –10% A, 90% B. 47 min – 95% A, 5% B. 47.01 min– 95% A, 5% B. 50 min–stop, 54.01 min.

## Primer sequences

| Gene name    | Exon forward | Sequence (5'–3')       |
|--------------|--------------|------------------------|
|              | Exon reverse |                        |
| <i>MKNK2</i> | e12 For      | GCTGCGACCTGTGGAGCCTGGG |
|              | e14a Rev     | GATGGGAGGGTCAGGCGTGGTC |
|              | e14b Rev     | GAGGAGGAAGTGACTGTCCCAC |
| <i>GAPDH</i> | For          | ATCAAGAAGGTGGTGAAGCAG  |
|              | Rev          | CTTACTCCTTGGAGGCCATGT  |

**Table S1:** primers used for RT-PCR presented in Figure 1 and Figure S4.

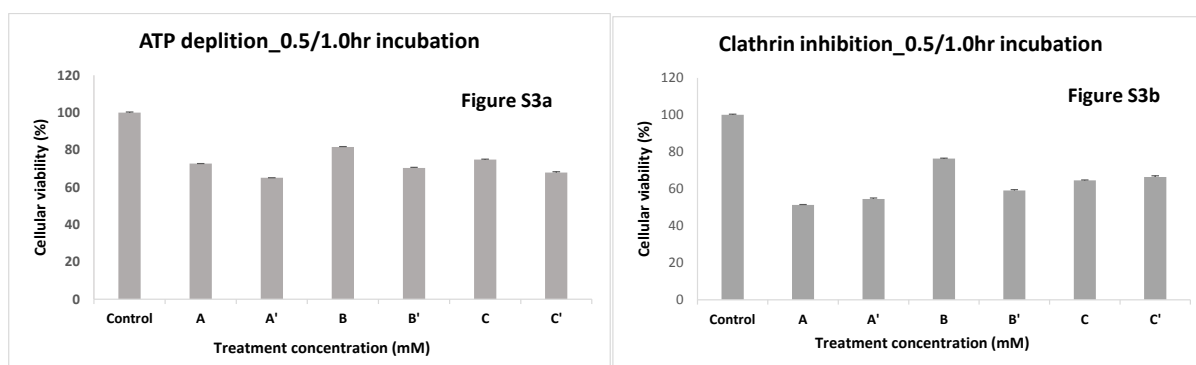

**Figure S3:** MTT Assay-cells treated under ATP depletion and hyperosmolar sucrose conditions

### Figure S3a

Control U87-MG glioblastoma cells: no treatment

A/A'-cells: treated with endocytosis inhibition reagents (10mM sodium azide + 50mM 2-deoxy-D-glucose) for 0.5hr/1.0hr

B/B'- cells: treated with endocytosis inhibition reagents (5mM sodium azide + 25mM 2-deoxy-D-glucose) for 0.5hr/1.0hr

C/C'- cells: treated with endocytosis inhibition reagents (2.5mM sodium azide + 12.5mM 2-deoxy-D-glucose) for 0.5hr/1.0hr

### Figure S3b.

Control U87-MG glioblastoma cells: no treatment

A/A'-cells: treated with endocytosis inhibition reagents (0.45M Sucrose) for 0.5hr/1.0hr

B/B'- cells: treated with endocytosis inhibition reagents (0.22M Sucrose) for 0.5hr/1.0hr

C/C'- cells: treated with endocytosis inhibition reagents (0.11M Sucrose) for 0.5hr/1.0hr

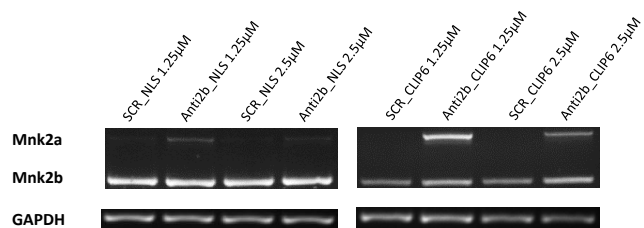

**Figure S4. Repeated gel - Mnk2a isoform formation by Anti2b-PNA-NLS and Anti2b-PNA-CLIP6 SSOs.** U87MG cells were incubated with 1.25 and 2.5 $\mu$ M Anti2b-CLIP6-PNA, Anti2b-NLS-PNA or scrambled control PNAs. RT-PCR was determined after 72 hours.
